# Supplementary material
Source: HighWire-hosted journal article supplement (https://bmjopenquality.bmj.com/content/10/4/e001432)
Supplement: inline-supplementary-material-1 [file inline-supplementary-material-1.pdf]

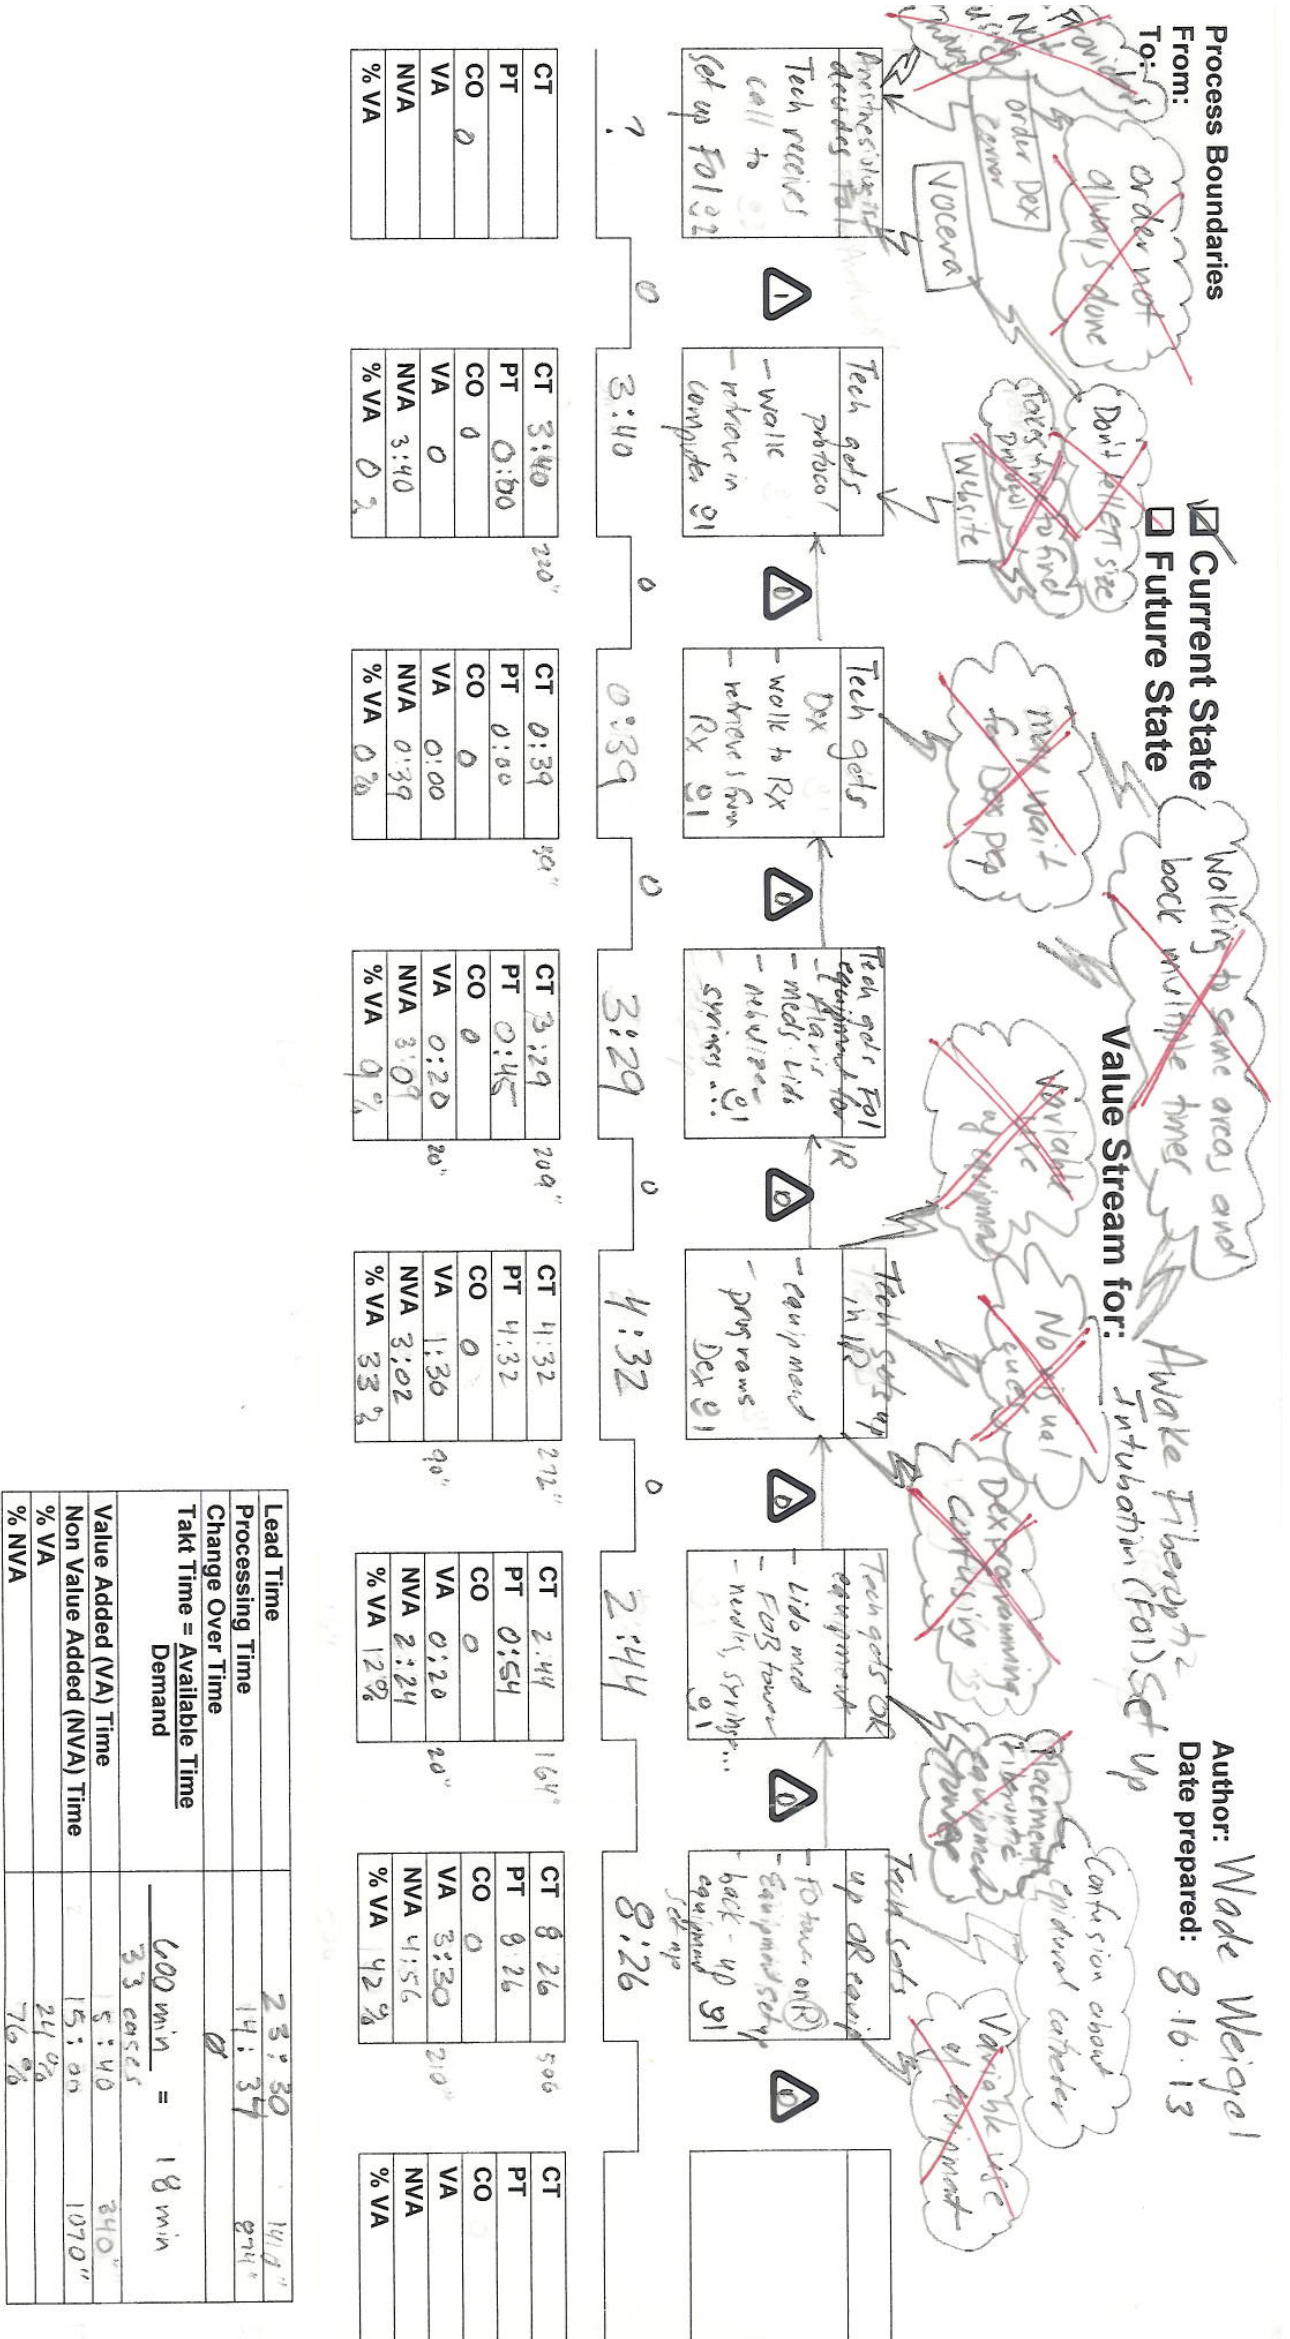

|                                     |                  |       |
|-------------------------------------|------------------|-------|
| Lead Time                           | 23:30            | 1414" |
| Processing Time                     | 14:34            | 874"  |
| Change Over Time                    | 0                |       |
| Takt Time = Available Time / Demand | 600 min = 18 min |       |
| Value Added (VA) Time               | 5:40             | 340"  |
| Non Value Added (NVA) Time          | 15:05            | 1070" |
| % VA                                | 24%              |       |
| % NVA                               | 76%              |       |

**VIRGINIA MASON**  
**PRODUCTION SYSTEM**

© 2007, Virginia Mason Medical Center

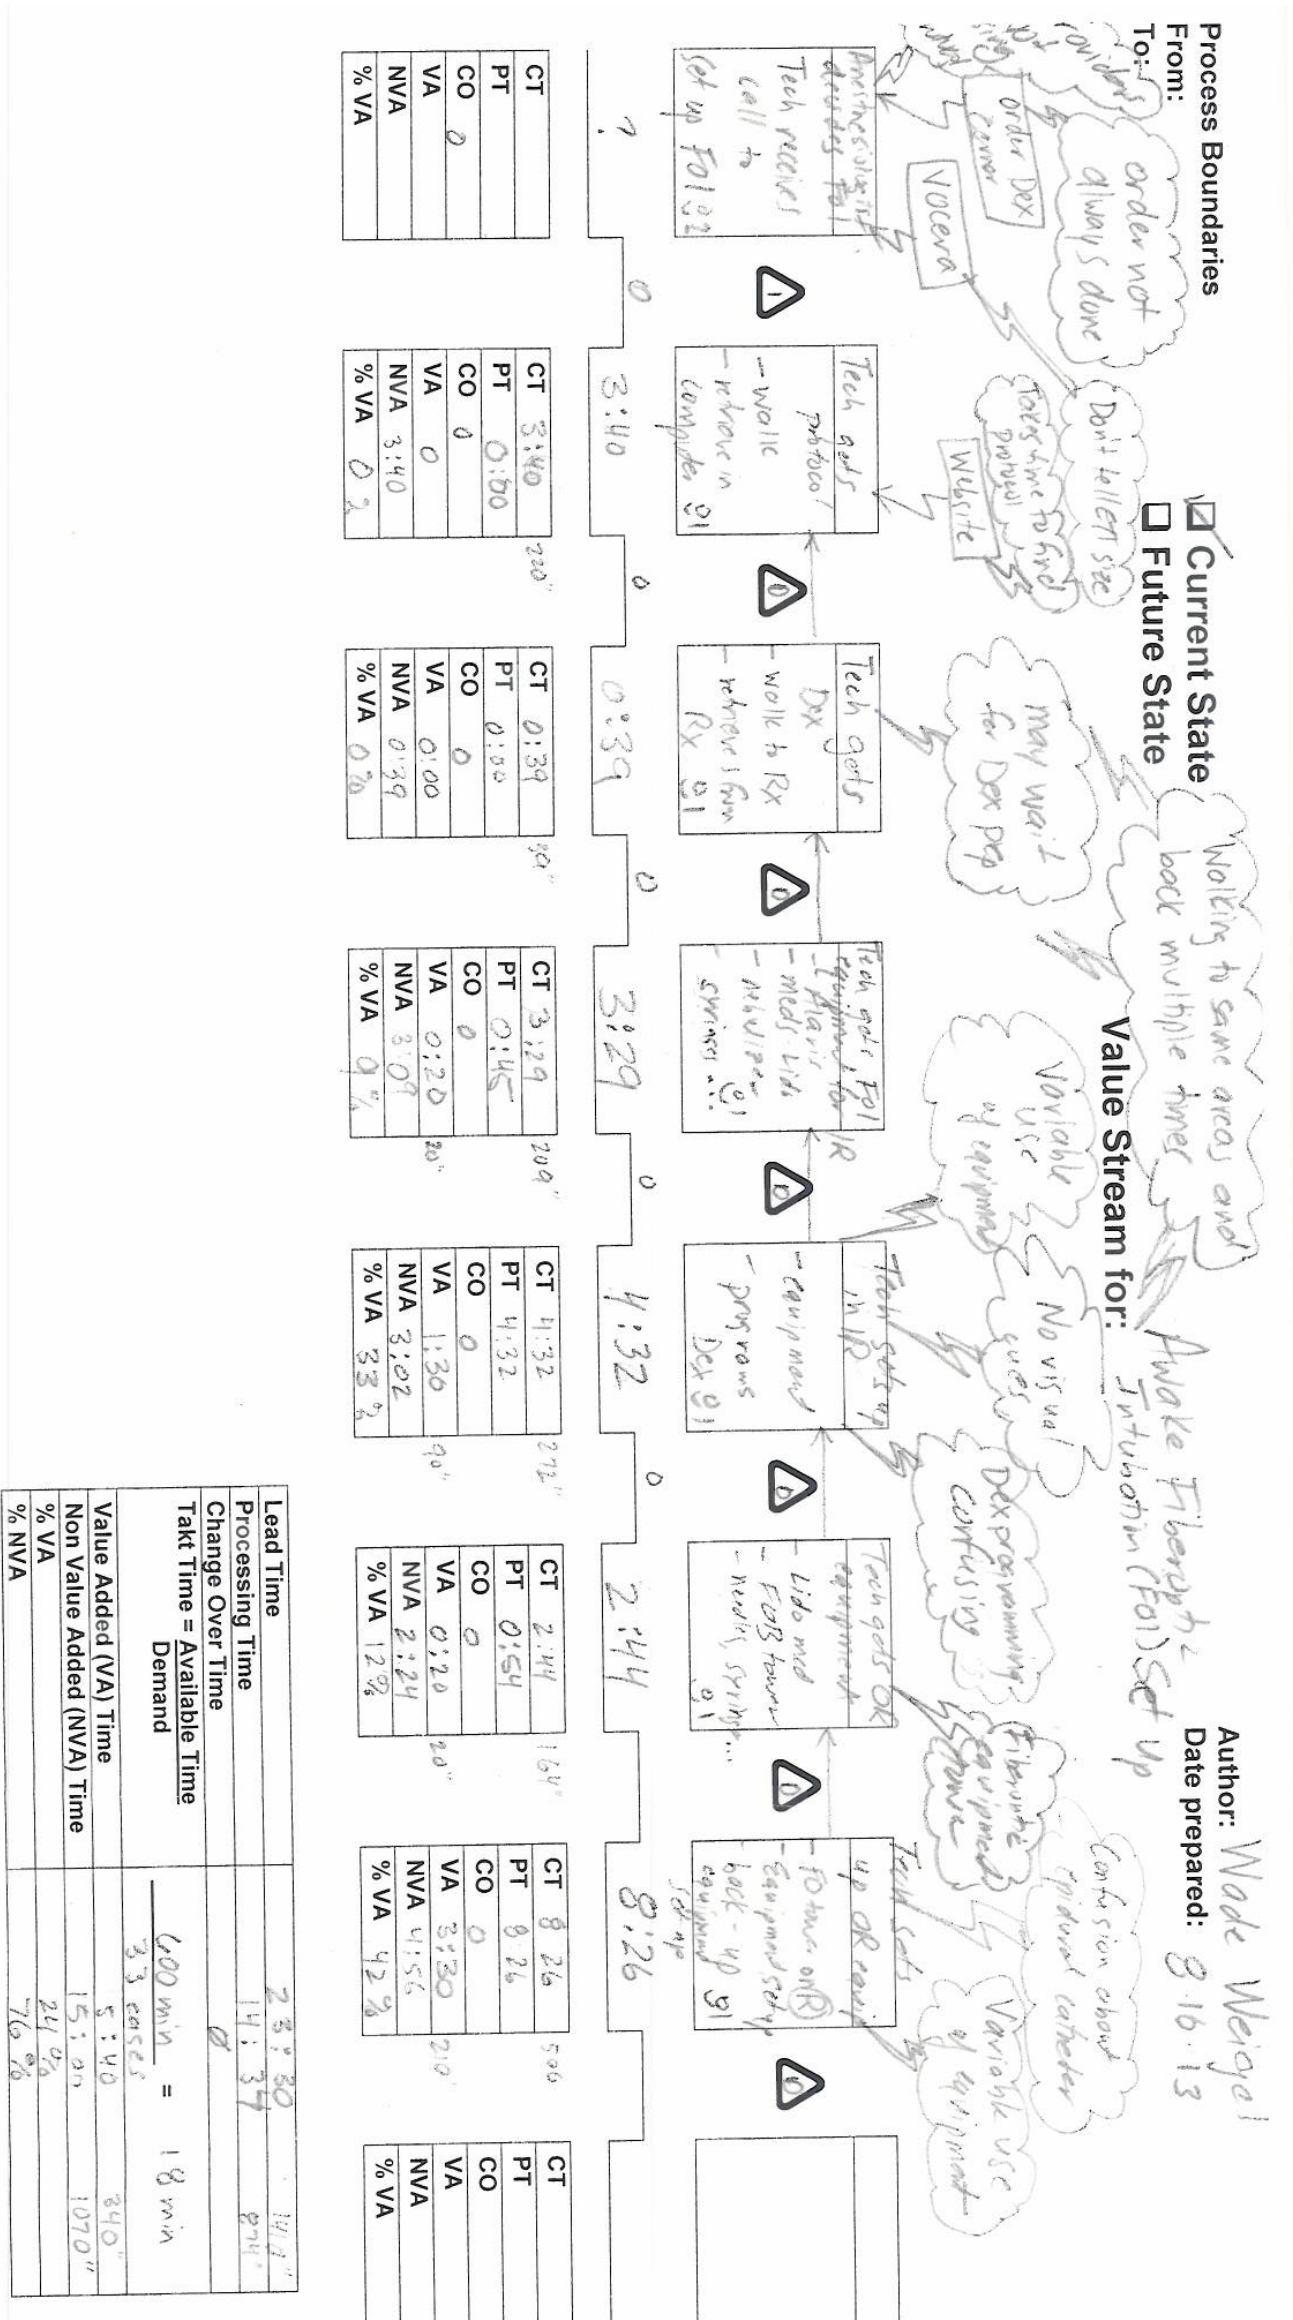

Process Boundaries  
From:  
To:

- Current State
- Future State

Value Stream for: *Aware Fiberoptic Intubation SET up*

*Author: Wade Weigel  
Date prepared: 3/19/14*

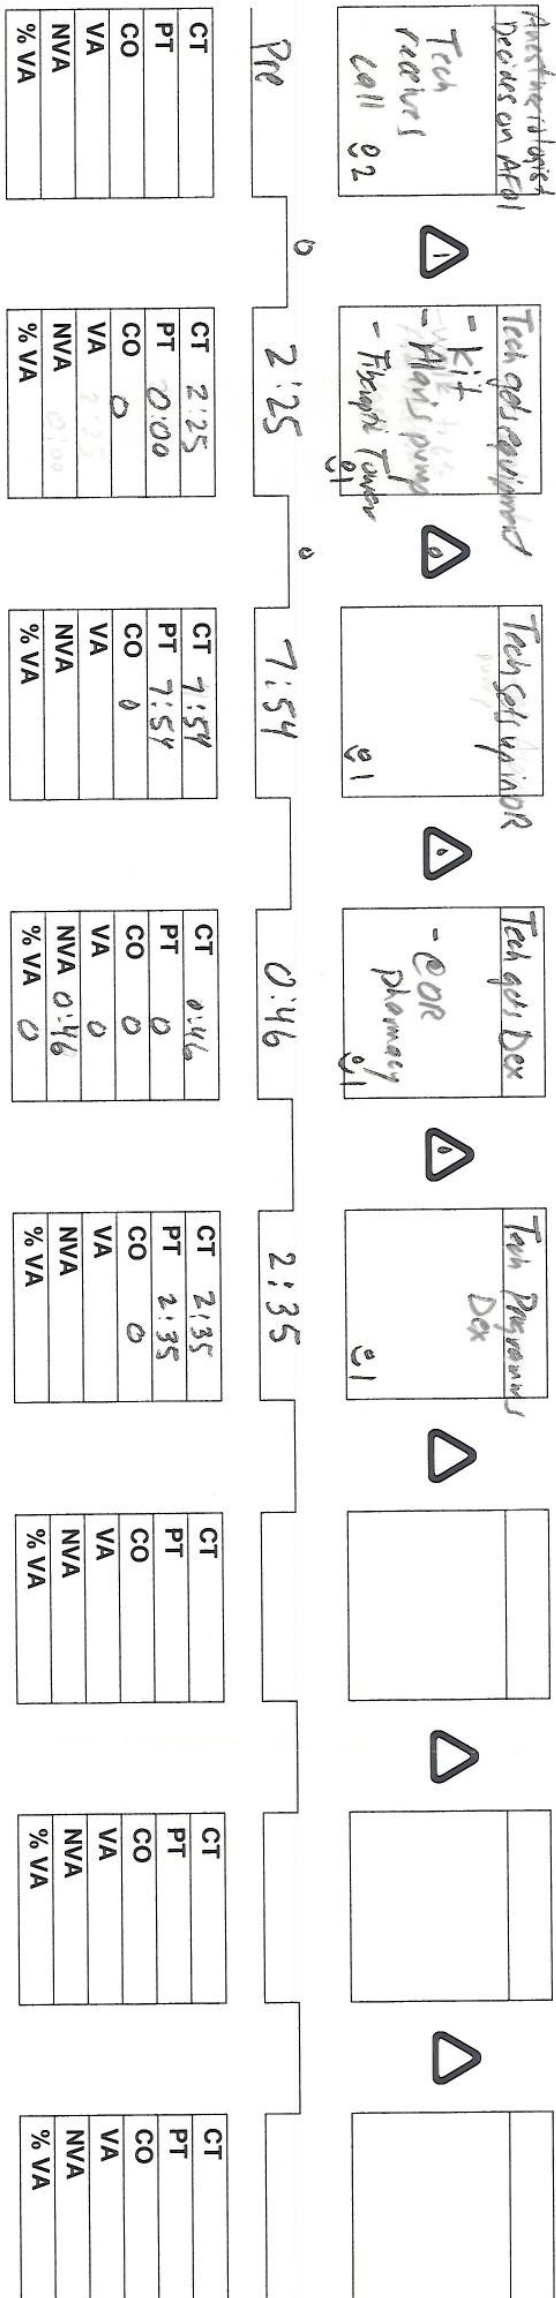

|                                   |  |
|-----------------------------------|--|
| Lead Time                         |  |
| Processing Time                   |  |
| Change Over Time                  |  |
| Takt Time = Available Time Demand |  |
| Value Added (VA) Time             |  |
| Non Value Added (NVA) Time        |  |
| % VA                              |  |
| % NVA                             |  |
